# Supplementary material for: 1,8-Diazabicyclo[5.4.0]-undec-7-ene based protic ionic liquids and their binary systems with molecular solvents catalyzed Michael addition reaction
Source: Royal Society of Chemistry journal article supplement (doi:10.1039/d0nj03012k), 2020-01-01
Supplement: d0nj03012k1.pdf [file d0nj03012k1.pdf]

## 1,8-diazabicyclo[5.4.0]-undec-7-ene based protic ionic liquids and their binary systems with molecular solvents catalyzed Michael addition reaction

Gulshan Ara<sup>a,b</sup>, Muhammed Shah Miran<sup>a</sup>, Md. Mominul Islam<sup>a</sup>, M. Yousuf A. Mollah<sup>a</sup>, M. Muhibur Rahman<sup>a</sup>, Md. Abu Bin Hasan Susan<sup>\*a</sup>

<sup>a</sup>Department of Chemistry, University of Dhaka, Dhaka-1000, Bangladesh

<sup>b</sup>Department of Chemistry, Jagannath University, Dhaka-1100, Bangladesh

\*[susan@du.ac.bd](mailto:susan@du.ac.bd); Fax: +88029667222; Tel: +88029661920 ext. 7162

### Electronic Supplementary Information (ESI)

**Fig. S1** Spotting and labeling of a TLC plate: (a) prior to developing; (b) developed at the initial stage of the reaction, and (c) after completion of the reaction.

**Fig. S2** FTIR spectra for (A) [HDBU]OH and (B) [HDBU]CH<sub>3</sub>COO.

**Fig S3** <sup>1</sup>H NMR spectra for (A) [HDBU]OH and (B) [HDBU]CH<sub>3</sub>COO.

**Fig. S4** <sup>13</sup>C NMR spectra for (A) [HDBU]OH and (B) [HDBU]CH<sub>3</sub>COO.

**Fig. S5** The change in conductivity and degradation temperature with mole fraction of DBU for binary systems of [HDBU]CH<sub>3</sub>COO with DBU and water.

**Fig. S6** The change in conductivity, degradation temperature and average reaction rate for the Michael addition reaction with mole fraction of DBU for binary systems of [HDBU]OH with DBU and water.

**Table S1** Reaction completion time and average rate for different systems as catalyst and reaction medium in the Michael addition reaction.

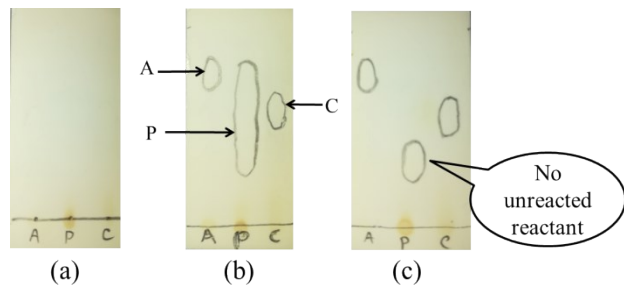

**Fig. S1** Spotting and labeling of a TLC plate: (a) prior to developing; (b) developed at the initial stage of the reaction, and (c) after completion of the reaction.

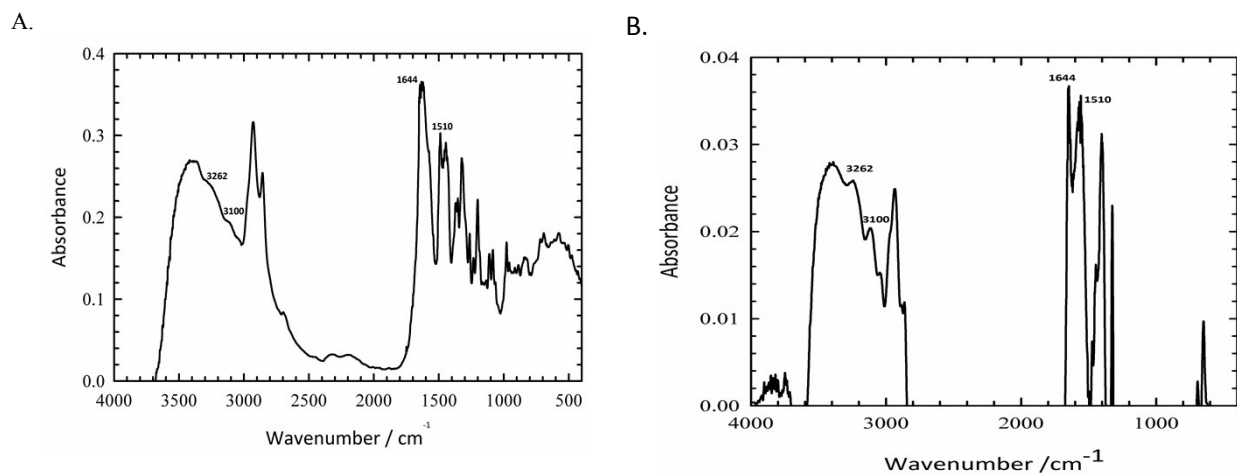

**Fig. S2** FTIR spectra for (A) [HDBU]OH and (B) [DBU]CH<sub>3</sub>COO.

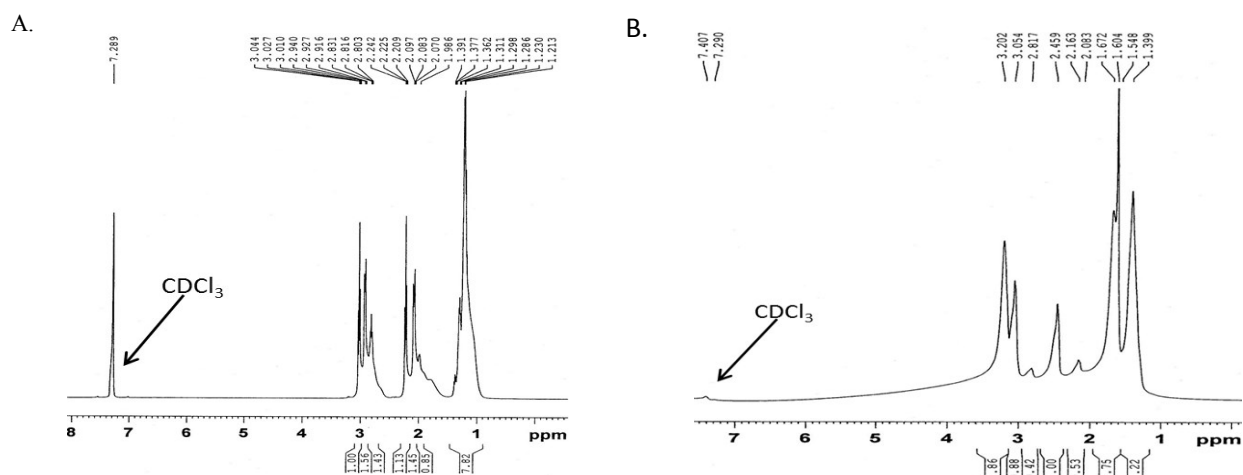

**Fig. S3** <sup>1</sup>H NMR spectra for (A) [HDBU]OH and (B) [HDBU]CH<sub>3</sub>COO.

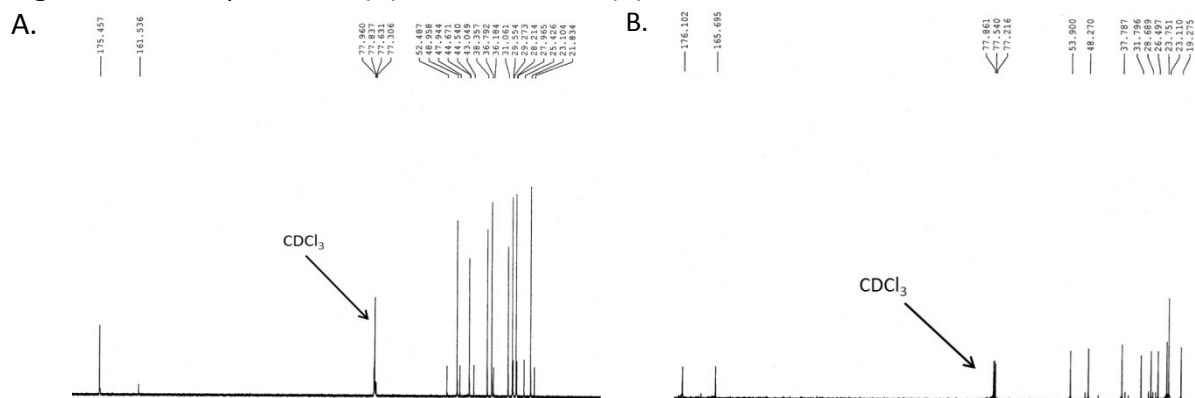

**Fig. S4**  $^{13}\text{C}$  NMR spectra for (A) [HDBU]OH and (B) [HDBU]CH<sub>3</sub>COO.

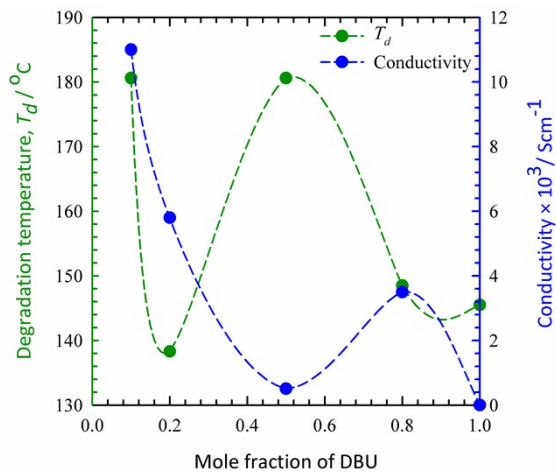

**Fig. S5** The change in conductivity and degradation temperature with mole fraction of DBU for binary systems of [HDBU]CH<sub>3</sub>COO with DBU and water.

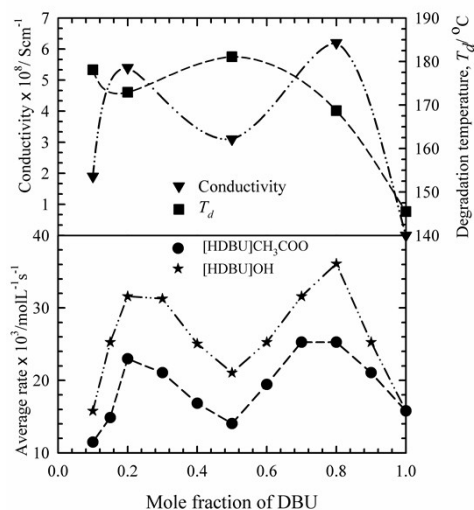

**Fig. S6** The change in conductivity, degradation temperature and average reaction rate for the Michael addition reaction with mole fraction of DBU for binary systems of [HDBU]OH with DBU and water.

**Table S1** Reaction completion time and average rate for different systems as catalyst and reaction medium in the Michael addition reaction.

| <b>Chemical Systems<br/>(0.5 mmol)</b>                                        | <b>Reaction Completion Time (min)</b> | <b>Average Rate (<math>v</math>)<br/>(<math>\text{molL}^{-1}\text{s}^{-1}</math>)<math>\times 10^4</math></b> |
|-------------------------------------------------------------------------------|---------------------------------------|---------------------------------------------------------------------------------------------------------------|
| NaOH                                                                          | 250                                   | 2.53                                                                                                          |
| DBU                                                                           | 240                                   | 2.63                                                                                                          |
| [HDBU]OH                                                                      | 180                                   | 3.51                                                                                                          |
| [HDBU]CH <sub>3</sub> COO                                                     | 270                                   | 2.34                                                                                                          |
| Binary systems of [HDBU]OH with H <sub>2</sub> O and DBU                      | 110 - 120                             | 5.27-5.74                                                                                                     |
| Binary systems of [HDBU]CH <sub>3</sub> COO with CH <sub>3</sub> COOH and DBU | 160-152                               | 3.95-4.16                                                                                                     |
